# Supplementary material for: Anti-Inflammatory and Antioxidant Effects of Regular Consumption of Cooked Ham Enriched with Dietary Phenolics in Diet-Induced Obese Mice
Source: PubMed Central journal article supplement (PMC7402095; doi:10.3390/antiox9070639), 2020-07-21
Supplement: antioxidants-09-00639-s001.pdf [file antioxidants-09-00639-s001.pdf]

**Table S1.** Phenolic compounds and derived metabolites searched in the urine samples by UPLC-ESI-QTOF-MS.

|                            |                                             |                                     |                                    |                                                      |                                                                 |
|----------------------------|---------------------------------------------|-------------------------------------|------------------------------------|------------------------------------------------------|-----------------------------------------------------------------|
| Hydroxy-tyrosol (HXT)      | Homovanillic acid/alcohol sulphate          | 3-O-Feruloylquinic acid             | EC-O-Glucuronide                   | 4'-O-Methyl-EGC-O-sulphate                           | 5-(3',4'/3',5'/4',5')-DHP)- $\gamma$ -VL glucuronide sulphate   |
| Methyl-HXT                 | Caffeic acid                                | Feruloylquinic acid glucuronide     | EC-O-Sulphate                      | 4'-O-Methyl-EGC-O-sulfoglucuronide                   | 5-(3',4'/3',5'/4',5')-DHP)- $\gamma$ -VL glucuronide disulphate |
| HXT-glucuronide            | 3-O-Caffeoyl-quinic acid (chlorogenic acid) | Dihydroferulic acid                 | EC-O-Sulfoglucuronide              | (Epi)Catechin gallate (ECG)                          | O-Methyl- 5-(3',4'/3',5'/4',5')-DHP)- $\gamma$ -VL glucuronide  |
| HXT-sulphate               | Caffeic acid 3/4-sulphate                   | Dihydroferulic acid 4-O-glucuronide | (3'/4')-methyl-ec                  | Gallic acid                                          | O-Methyl- 5-(3',4'/3',5'/4',5')-DHP)- $\gamma$ -VL sulphate     |
| HXT-methyl ether           | Dihydrocaffeic acid 3-O-glucuronide         | Dihydroferulic acid 4-sulphate      | (3'/4')-Methyl-EC-O-sulphate       | (3'/4')-O-Methylgallic acid                          | 5-(3',4',5'-THP)- $\gamma$ - VL                                 |
| HXT-methyl ether glucoside | Dihydrocaffeic acid 3-sulphate              | <i>p</i> -Coumaric acid             | (Epi)gallo catechin ( <i>egc</i> ) | HP Valeric acid glucuronide                          | 5-(3',4',5'-THP)- $\gamma$ - VL glucuronide                     |
| Tyrosol (ty)               | Caffeic acid 3/4-O-glucuronide              | <i>p</i> -Coumaric acid sulphate    | Egc-o-glucuronide                  | 5-(HP)- $\gamma$ -VL glucuronide                     | 5-(3',4',5'-THP)- $\gamma$ - VL sulphate                        |
| Ty-glucuronide             | (Iso)Ferulic acid                           | 4-Ethylcatechol                     | EGC-O-sulphate                     | 5-(HP)- $\gamma$ -VL glucuronide sulphate            | 5-(3',4',5'-THP)- $\gamma$ -VL glucuronide sulphate             |
| Ty-sulphate                | Ferulic acid 4-O-sulphate                   | Ethylcatechol glucuronide           | (3'/4')-O-Methyl-EGC               | 5-(3',4'/3',5')-DHP)- $\gamma$ -VL                   | Methyl-5-(3',4',5'-THP)- $\gamma$ -VL- glucuronide              |
| Homovanillic acid/alcohol  | Ferulic acid 4-O-glucuronide                | (Epi)catechin ( <i>ec</i> )         | 4'-O-Methyl-EGC-O-glucuronide      | 5-(3',4'/3',5'/4',5')-DHP)- $\gamma$ -VL glucuronide | Methyl-5-(3',4',5'- THP)- $\gamma$ -VL sulphate                 |
